# Supplementary material for: Preparation and characterization of chemically bonded argon–boroxol ring cation complexes
Source: Royal Society of Chemistry journal article supplement (doi:10.1039/c7sc02472j), 2017-01-01
Supplement: c7sc02472j1.pdf [file c7sc02472j1.pdf]

## **Supplementary Materials**

### **Preparation and Characterization of Chemically Bonded Argon-Boroxol Ring Cation Complexes**

Jiaye Jin, Wei Li, Yuhong Liu, Guanjun Wang, Mingfei Zhou\*

Department of Chemistry, Collaborative Innovation Center of Chemistry for Energy  
Materials, Shanghai Key Laboratory of Molecular Catalysis and Innovative Materials,  
Fudan University, Shanghai 200433, China, E-mail: mfzhou@fudan.edu.cn

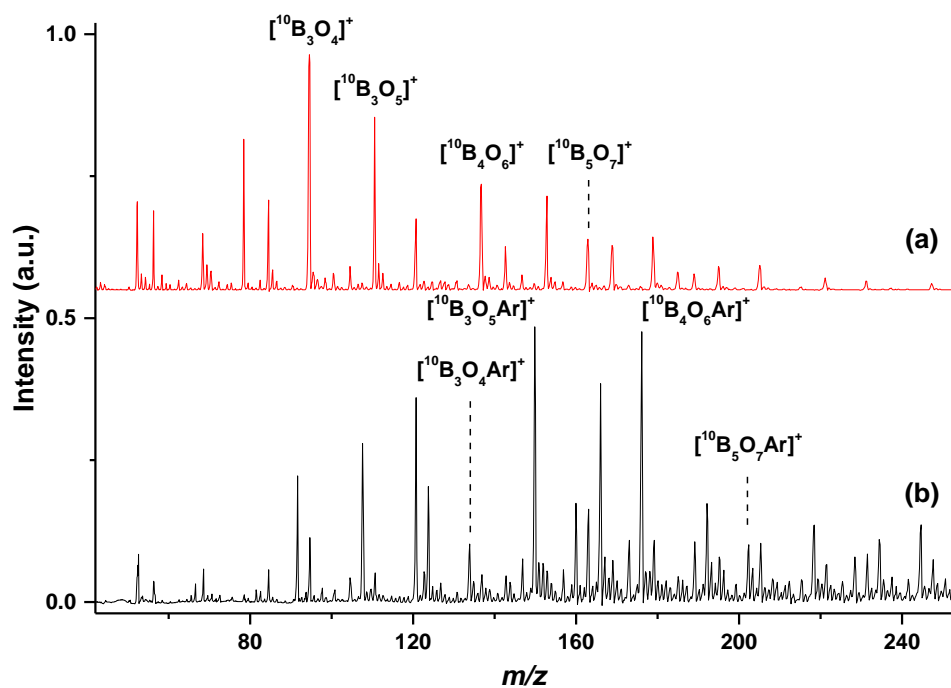

**Figure S1.** Mass spectra of boron oxide cation clusters in the  $m/z$  range of 40-250 produced by pulsed laser evaporation of a  $^{10}B$ -enriched boron target in expansion of (a) helium seeded with 1%  $O_2$  (red line), and (b) helium seeded with 10% argon and 1%  $O_2$  (black line).

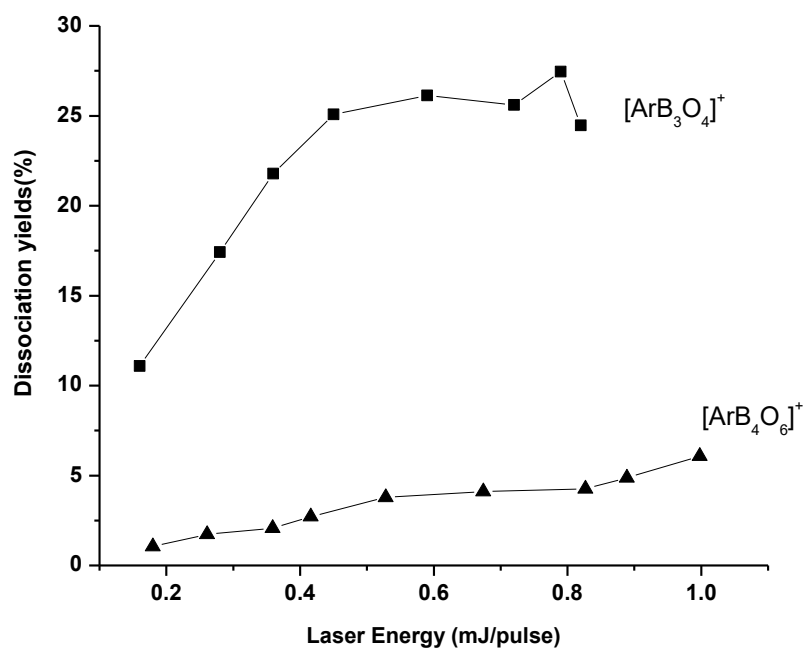

**Figure S2.** Plots of the photodissociation yields of  $[\text{ArB}_3\text{O}_4]^+$  and  $[\text{ArB}_4\text{O}_6]^+$  as a function of IR laser energy.

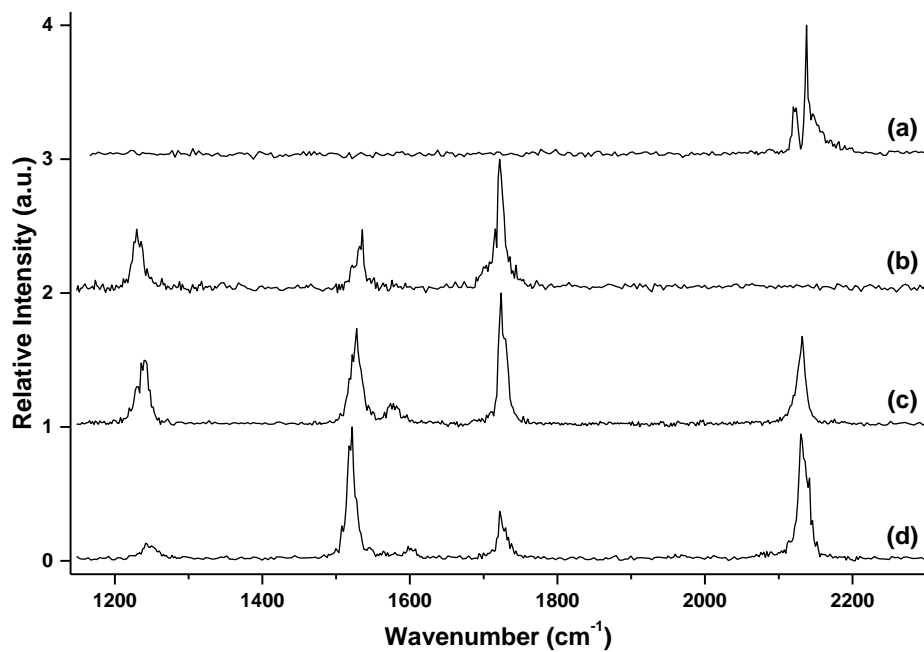

**Figure S3.** Infrared photodissociation spectra of mass-selected cation complexes in the 1150-2300 cm<sup>-1</sup> region measured by monitoring the argon photodissociation channel. (a) [Ar<sup>10</sup>B<sub>3</sub>O<sub>4</sub>]<sup>+</sup>, (b) [Ar<sup>10</sup>B<sub>3</sub>O<sub>5</sub>]<sup>+</sup>, (c) [Ar<sup>10</sup>B<sub>4</sub>O<sub>6</sub>]<sup>+</sup>, and (d) [Ar<sup>10</sup>B<sub>5</sub>O<sub>7</sub>]<sup>+</sup>.

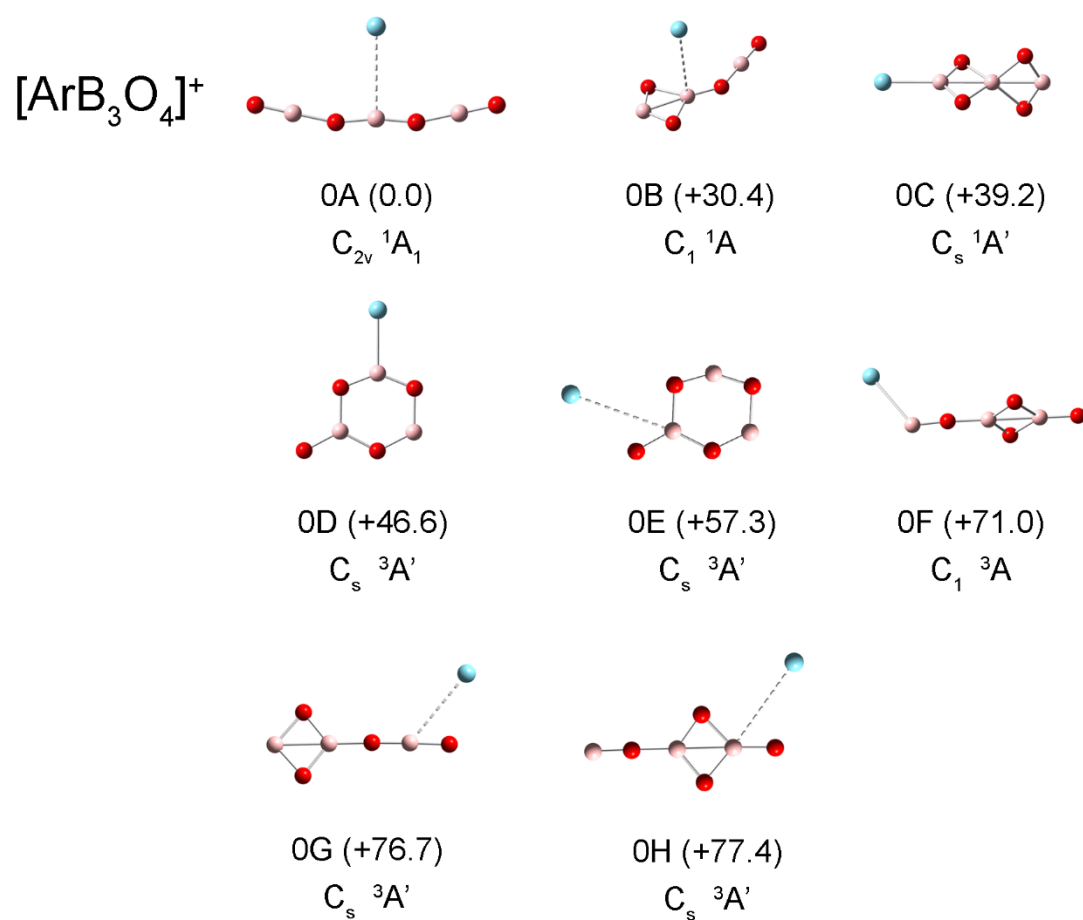

**Figure S4.** Optimized structures of the  $[\text{ArB}_3\text{O}_4]^+$  isomers at the B3LYP / aug-cc-pVTZ level. The symmetry, electronic states, and relative energies with zero-point energy corrected (kcal/mol) are shown in the figure.

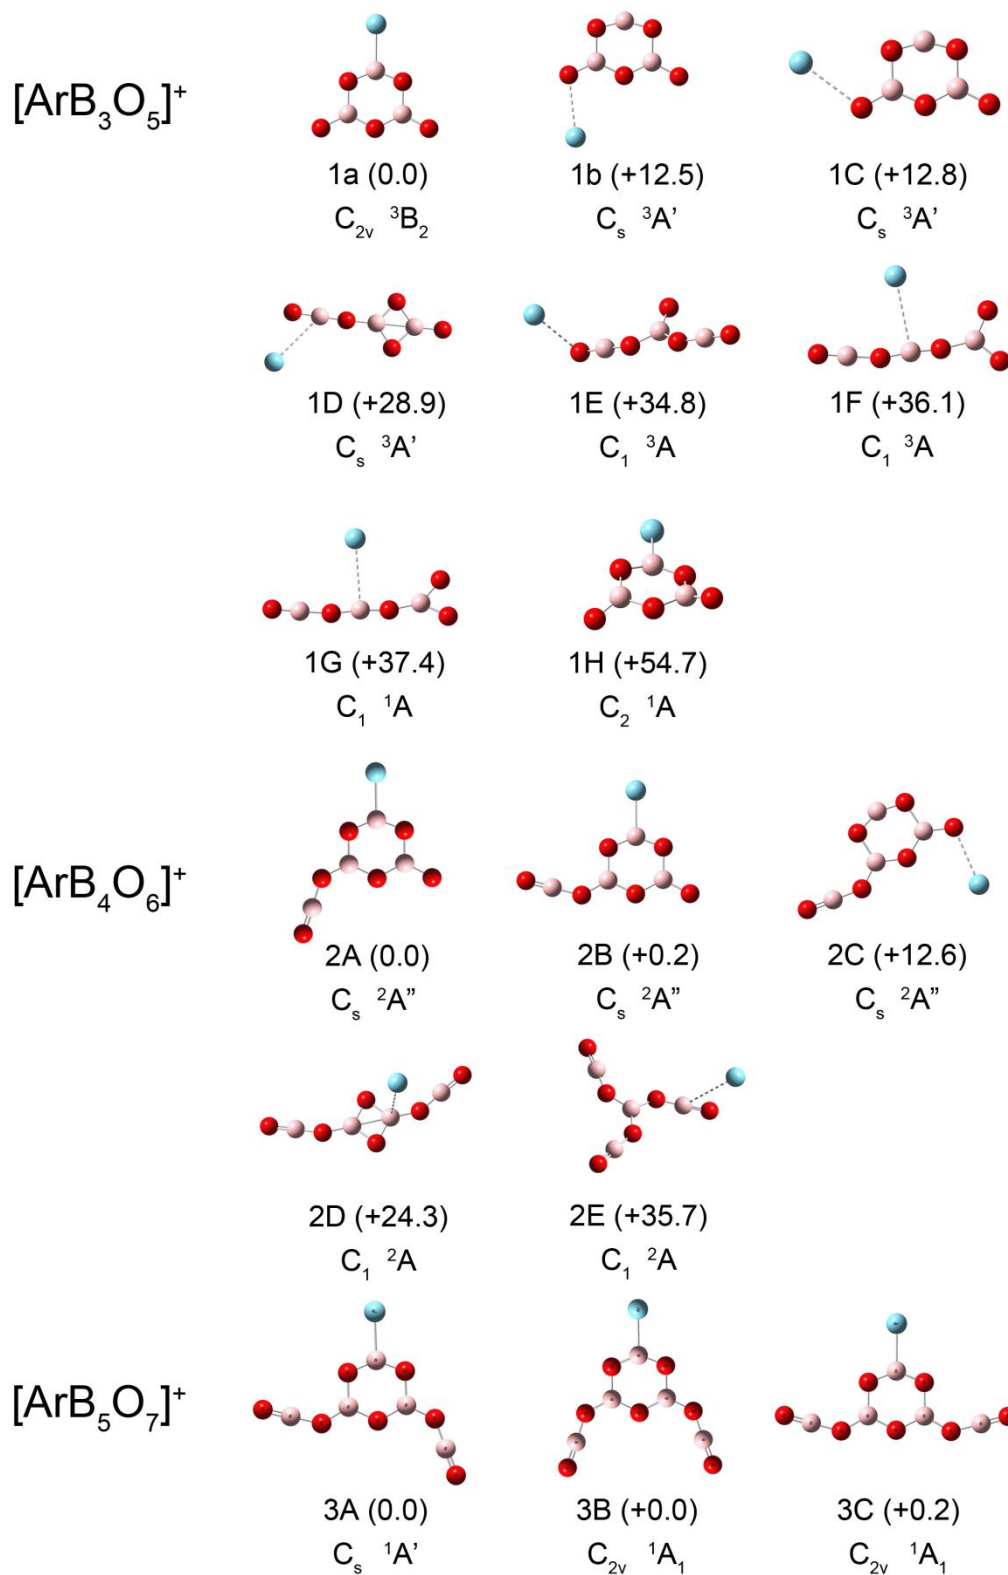

**Figure S5.** Optimized structures of the  $[\text{ArB}_3\text{O}_5]^+$ ,  $[\text{ArB}_4\text{O}_6]^+$ , and  $[\text{ArB}_5\text{O}_7]^+$  isomers at the B3LYP / aug-cc-pVTZ level. The symmetry, electronic states, and relative energies with zero-point energy corrected (kcal/mol) are shown in the figure.

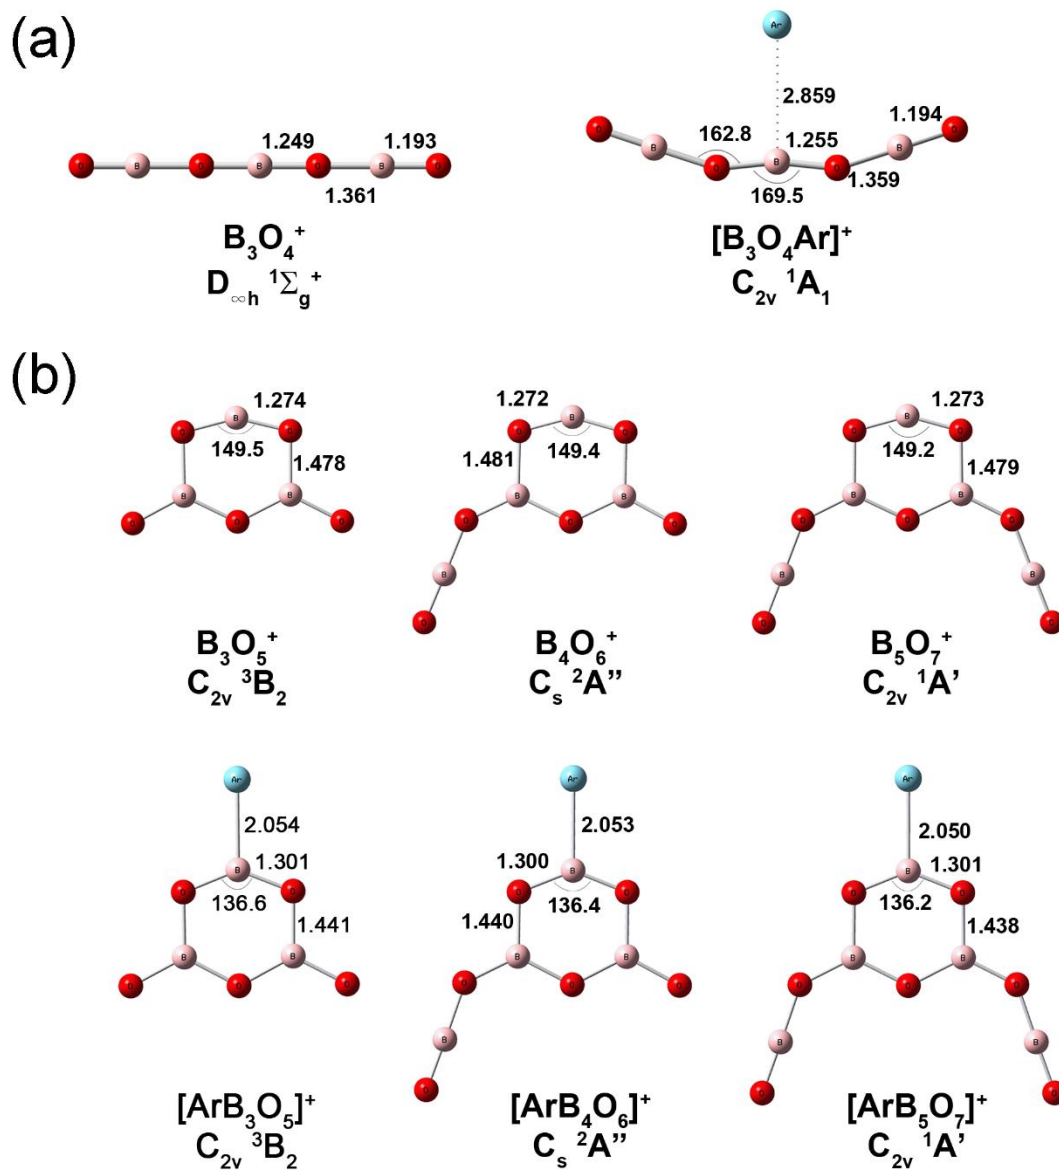

**Figure S6.** Optimized structures of the most stable structure of the  $[ArB_3O_4]^+$ ,  $[ArB_3O_5]^+$ ,  $[ArB_4O_6]^+$  and  $[ArB_5O_7]^+$  cation complexes and the bare  $[B_3O_4]^+$ ,  $[B_3O_5]^+$ ,  $[B_4O_6]^+$  and  $[B_5O_7]^+$  cations at the B3LYP-D3/aug-cc-pVTZ level of theory. The bond lengths are given in angstroms and bond angles in degrees.

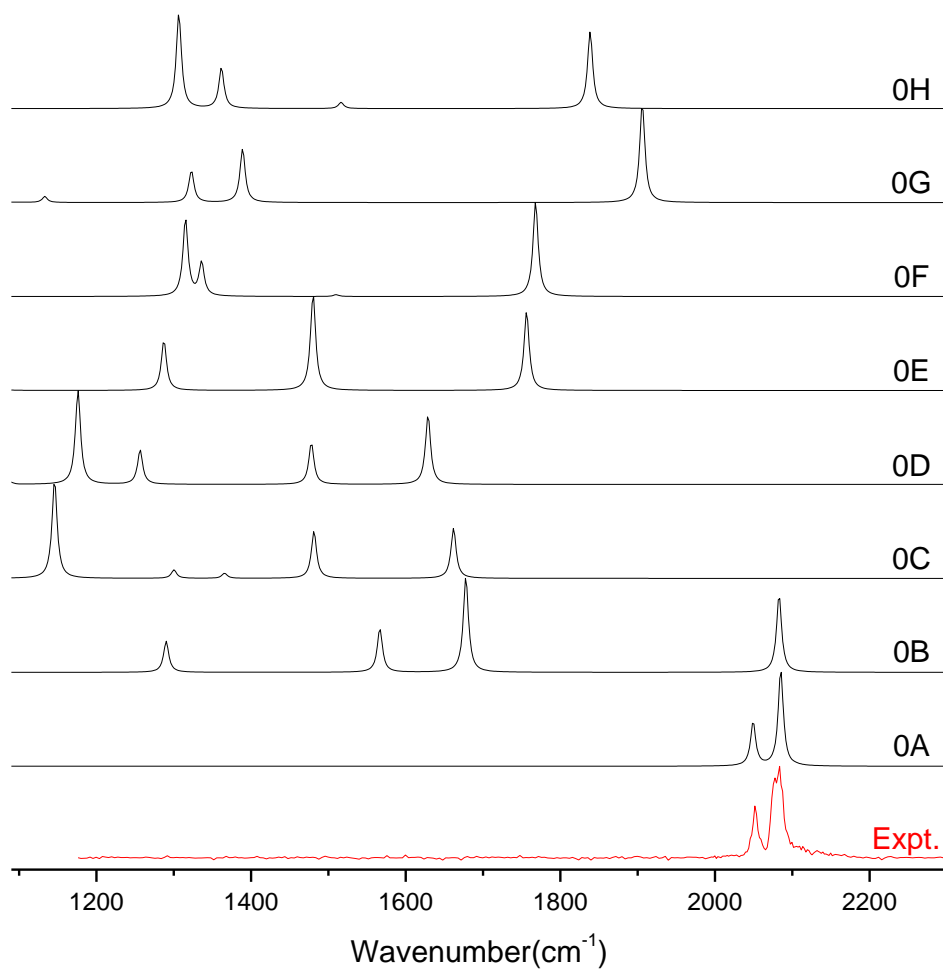

**Figure S7.** Experimental (red) and simulated vibrational spectra of  $[\text{Ar}^{11}\text{B}_3\text{O}_4]^+$  in the 1090-2300  $\text{cm}^{-1}$  region. The simulated spectra are obtained from unscaled harmonic vibrational frequencies and intensities calculated at the B3LYP-D3/aug-cc-pVTZ level for the structures shown in Figure S3.



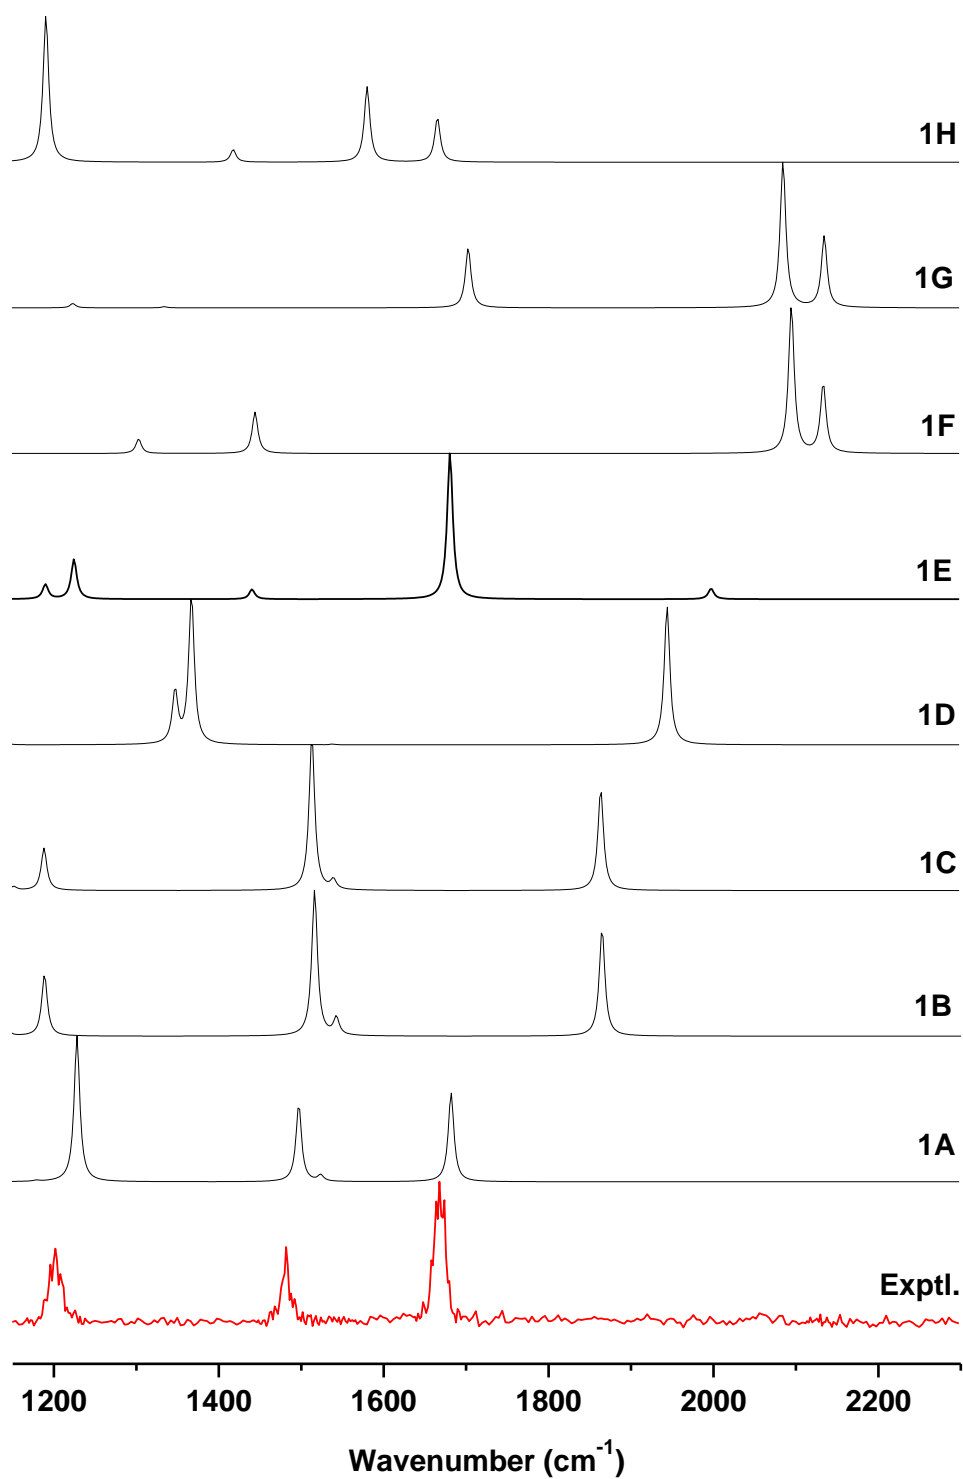

**Figure S8.** Experimental (red) and simulated vibrational spectra of [Ar<sup>11</sup>B<sub>3</sub>O<sub>5</sub>]<sup>+</sup> in the 1150-2300 cm<sup>-1</sup> region. The simulated spectra are obtained from unscaled harmonic vibrational frequencies and intensities calculated at the B3LYP-D3/aug-cc-pVTZ level for the structures shown in Figure S4.

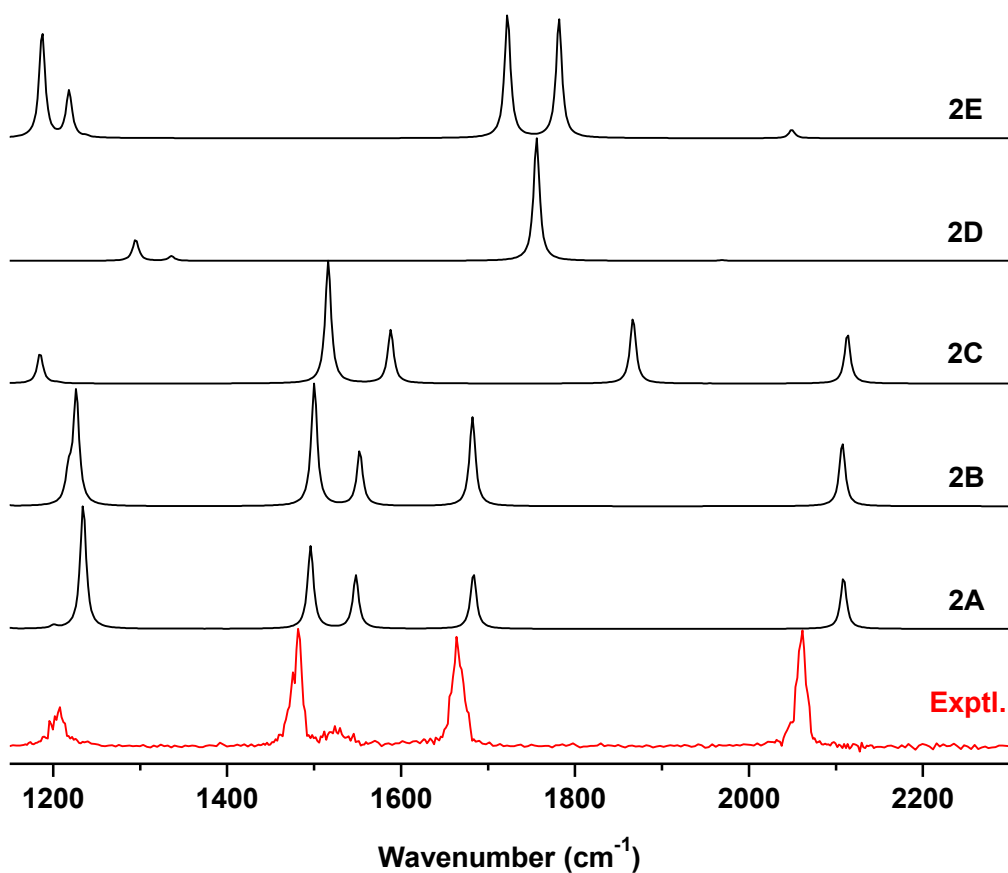

**Figure S9.** Experimental (red) and simulated vibrational spectra of  $[\text{Ar}^{11}\text{B}_4\text{O}_6]^+$  in the  $1150\text{-}2300\text{ cm}^{-1}$  region. The simulated spectra are obtained from unscaled harmonic vibrational frequencies and intensities calculated at the B3LYP-D3/aug-cc-pVTZ level for the structures shown in Figure S4.

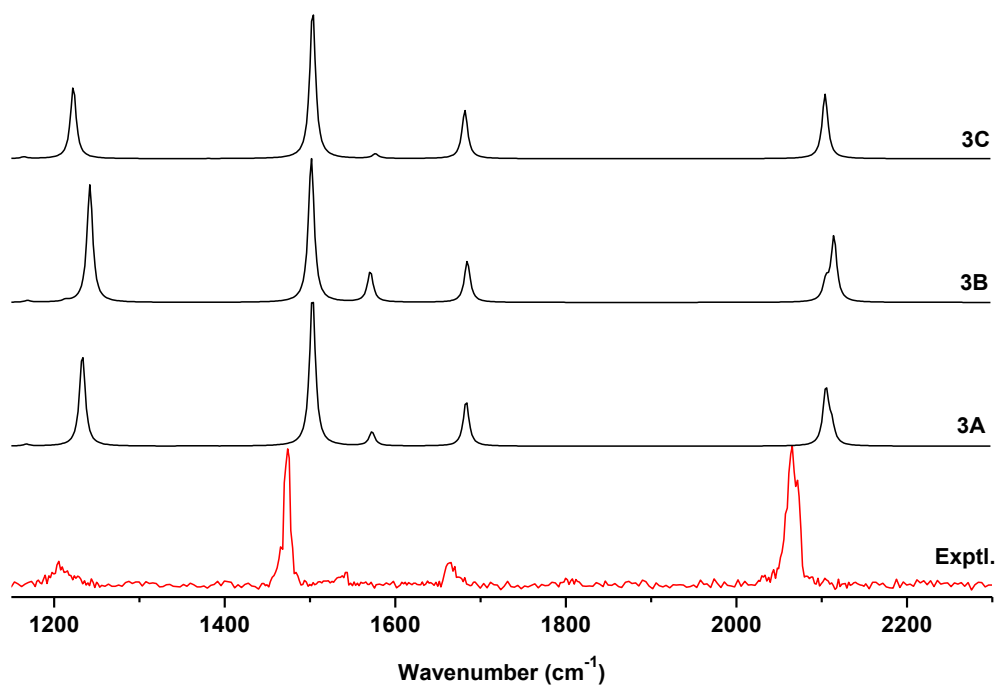

**Figure S10.** Experimental (red) and simulated vibrational spectra of  $[\text{Ar}^{11}\text{B}_5\text{O}_7]^+$  in the 1150-2300  $\text{cm}^{-1}$  region. The simulated spectra are obtained from unscaled harmonic vibrational frequencies and intensities calculated at the B3LYP-D3/aug-cc-pVTZ level for the structures shown in Figure S4.

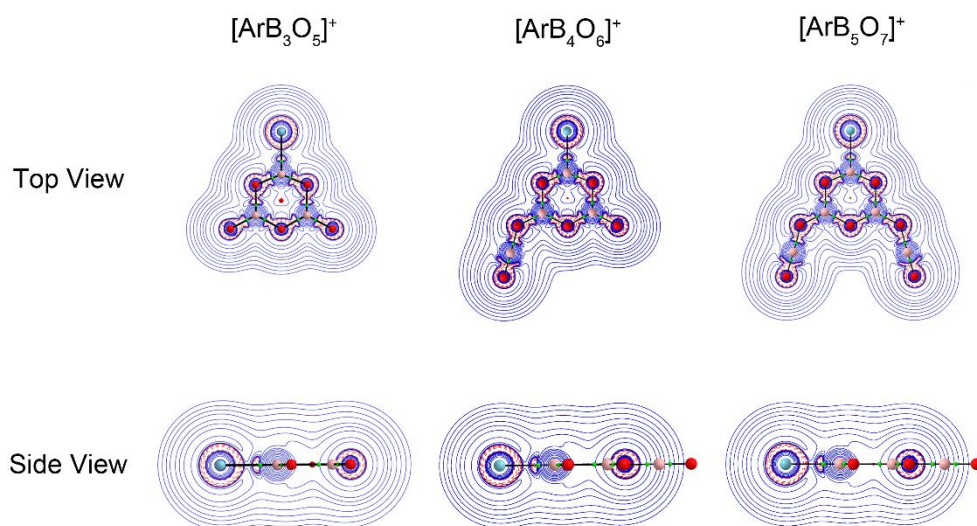

**Figure S11.** Contour diagrams of the Laplacian of the electron density ( $\nabla^2\rho(r)$ ) of  $[\text{ArB}_3\text{O}_5]^+$ ,  $[\text{ArB}_4\text{O}_6]^+$  and  $[\text{ArB}_5\text{O}_7]^+$  in the top view (molecular plane) and side view.

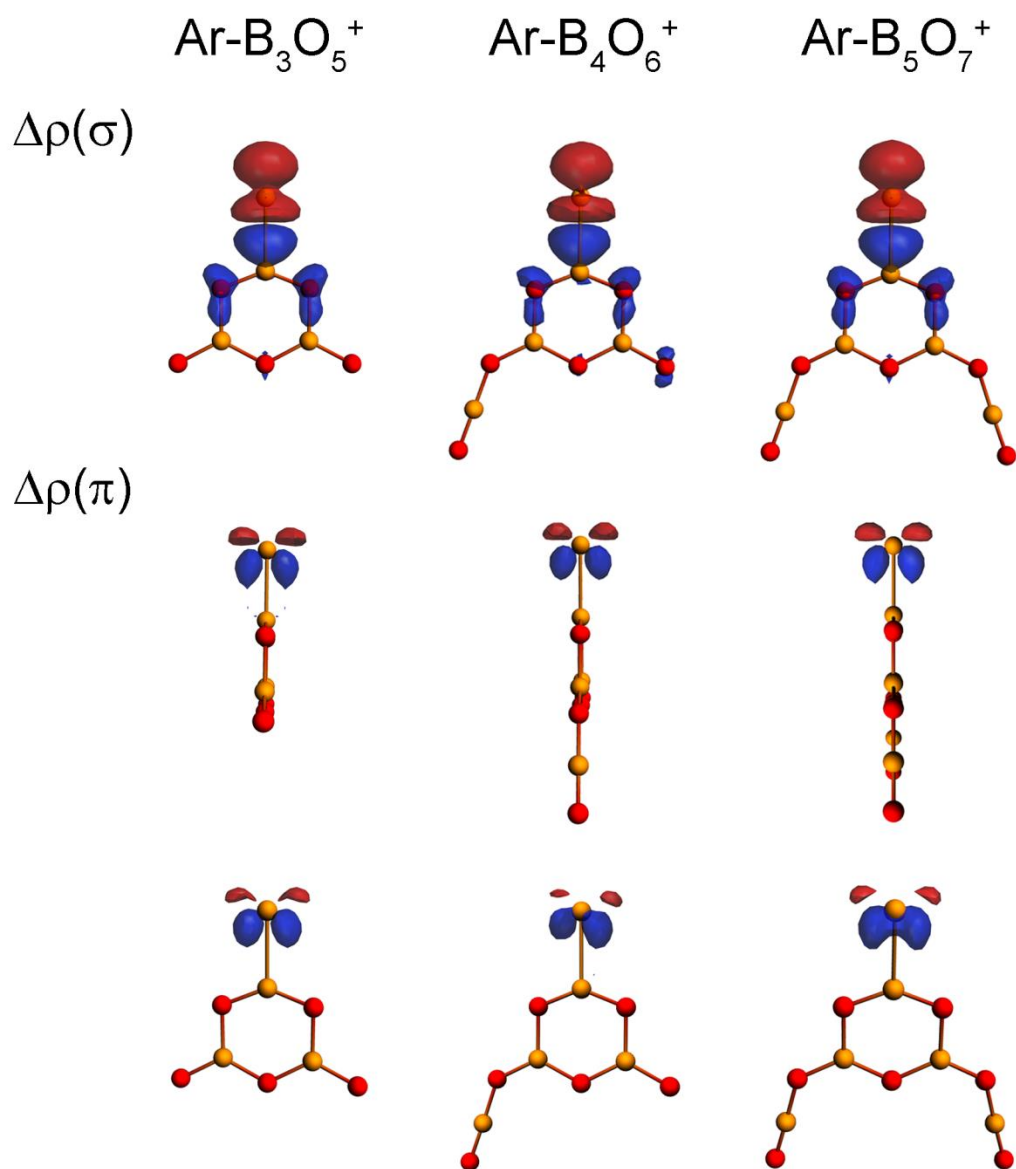

**Figure S12.** Plots of deformation densities  $\Delta\rho$  of the pairwise  $\sigma$  and  $\pi$  orbital interactions between Ar and boron oxide cation fragments in  $[\text{ArB}_3\text{O}_5]^+$ ,  $[\text{ArB}_4\text{O}_6]^+$ , and  $[\text{ArB}_5\text{O}_7]^+$ . The direction of charge flow is red to blue.
